## Mathematical model of a cytokine storm

Irina Kareva<sup>1\*</sup>, Faina Berezovskaya<sup>2</sup>, Georgy Karev<sup>3</sup>

<sup>1\*</sup> Computational and Modeling Sciences Center, Arizona State University, Tempe, AZ, 85287, USA. Email: [ikareva@asu.edu](mailto:ikareva@asu.edu)

<sup>2</sup> Department of Mathematics, Howard University, Washington, DC, 20059, [fberezovskaya@howard.edu](mailto:fberezovskaya@howard.edu)

<sup>3</sup> National Center for Biotechnology Information, National Institutes of Health - Bldg. 38A, 8600 Rockville Pike, Bethesda, MD 20894, USA. Email: [karev@ncbi.nlm.nih.gov](mailto:karev@ncbi.nlm.nih.gov)

### Abstract

Cytokine storm is a life-threatening inflammatory response that is characterized by hyperactivation of the immune system, and which can be caused by various therapies, autoimmune conditions, or pathogens, such as respiratory syndrome coronavirus 2 (SARS-CoV-2), which causes coronavirus disease COVID-19. While initial causes of cytokine storms can vary, late-stage clinical manifestations of cytokine storm converge and often overlap, and therefore a better understanding of how normal immune response turns pathological is warranted. Here we propose a theoretical framework, where cytokine storm phenomenology is captured using a conceptual mathematical model, where cytokines can both activate and regulate the immune system. We simulate normal immune response to infection, and through variation of system parameters identify conditions where, within the frameworks of this model, cytokine storm can arise. We demonstrate that cytokine storm is a transitional regime, and identify three main factors that must converge to result in storm-like dynamics, two of which represent individual-specific characteristics, thereby providing a possible explanation for why some people develop CRS, while others may not. We also discuss possible ecological insights into cytokine-immune interactions and provide mathematical analysis for the underlying regimes. We conclude with a discussion of how results of this analysis can be used in future research.

**Keywords:** cytokine release syndrome; CRS, cytokine storm, mathematical model, IFN-gamma; IL-6; second touch hypotheses



## 32 Introduction

33 Cytokine storm, a life-threatening inflammatory response involving elevated levels of cytokines  
34 and hyper activation of the immune system, has recently gained particular note as one of the  
35 causes of morbidity and mortality from coronavirus disease COVID-19 (1). It has previously  
36 been observed in a variety of other circumstances, including graft vs host disease (2) and other  
37 viral infections, such as SARS (3); cytokine storms have also been implicated as one of the key  
38 culprits in the severity of the 1918 Spanish flu pandemic (4). Additionally, cytokine storms have  
39 been observed as a side effect of certain anti-cancer therapeutic interventions, such as chimeric  
40 antigen receptor, of CAR-T cell therapy (5) and bispecific T cell engagers, also known as BiTEs  
41 (6). One of the most notable therapy-induced instances of cytokine storm was the case of a  
42 Phase I clinical trial of monoclonal antibody TGN1412, which resulted in severe damage to the  
43 health of six volunteers that participated in the trial despite very accurately chosen initial doses  
44 that were administered to them (7); numerous additional reports of the details of the case can  
45 be found in the literature.

46 Cytokine storms are most often characterized by severe lung infections, which can lead  
47 to respiratory distress, multi-organ failure, sepsis and in some cases, death (5,8,9).  
48 Mechanistically, cytokine storms are mitigated by cytokines, which are molecules involved in  
49 supporting and regulating the immune response. Cytokine interactions form complex networks,  
50 geared towards mounting fast and efficient immune response against pathogens while also  
51 preventing excessive damage to normal tissues. If these interactions become destabilized,  
52 cytokine storms, or hypercytokinemia, may occur, where immune response causes greater  
53 collateral harm than benefit. Some prominent cytokines that are elevated during cytokine storms  
54 include interferon (IFN)-gamma, tumor necrosis factor (TNF)-alpha, as well as interleukins (IL)-  
55 6,8 and 10 (1,3,5,8,9). More generally, cytokine storms appear to reflect a scenario when the  
56 response to a pathogen, or an immune stimulatory agent, rather than a pathogen itself, results  
57 in pathology, and this is the mechanism that we wish to explore in greater detail.

58 Notably, while they are often used interchangeably, there exists a distinction between  
59 the terms “cytokine storm” and “cytokine release syndrome” (CRS). Cytokine storm typically  
60 refers to an acute reaction, while CRS typically refers to a more delayed response. There exists  
61 a discussion about qualitative differences between the two responses, how they are triggered  
62 and how they proceed (5), although it appears that the final qualitative dynamics are very similar  
63 between the two. Henceforth we will be using the term cytokine storm; however, we believe that  
64 the proposed model can be used for better understanding of CRS as well.

65           Several mathematical models have been developed to try to create and formalize a  
66 framework for better mechanistic understanding of cytokine storm dynamics. Waito et al. (10)  
67 proposed a mathematical model of cytokine storm, where they grouped cytokines into 7  
68 categories based on their pro- and anti-inflammatory properties. They use the model,  
69 parameterized with mouse data, to describe the mutual influence of cytokine groups on each  
70 other during a cytokine storm. Yiu et al. (11) developed a large scale eighteen-order  
71 mathematical model to analyze the data from the TGN1412 clinical trial, using principal  
72 component analysis to reveal functional cytokine clusters that were specific to this case.  
73 Hopkins et al. (12) created a model of 9 major cytokines affecting the outcome of CAR-T cell  
74 based therapy. A smaller more conceptual model was proposed by Baker et al. (13), where a  
75 two-dimensional system of equations captured interactions between pro- and anti-inflammatory  
76 cytokines, displaying large regions of bi-stability and oscillations reminiscent of immune  
77 behavior in rheumatoid arthritis; the model was later extended by other authors, such as by  
78 Zhang et al. (14).

79           Here we propose a conceptual mathematical model that is aimed to capture general  
80 phenomenology of transition from norm to storm rather than the intricate details of cytokine  
81 biology and interactions. We use the model to identify within a theoretical framework what  
82 factors may be critical to result in this transition. The model is coupled with a model of viral  
83 infection to initiate the immune-cytokine dynamics, which can be substituted with a different sub-  
84 model depending on the question, since, according to (8), although the initial drivers leading to  
85 cytokine storm dynamics may differ, late-stage clinical manifestations of cytokine storm  
86 converge and often overlap, and therefore we expect the proposed modeling framework to be  
87 translatable for different causes.

88           Through our analysis, we identify key processes that within this framework can result in  
89 storm-like behavior. We demonstrate existence of a sequence of regimes as one transitions  
90 from normal to storm-like behavior, that is parameter dependent. We show the impact of both  
91 intrinsic individual-specific characteristics and infection-specific characteristics that need to  
92 converge in order to result in a cytokine storm. We analyze the immune-cytokine dynamics from  
93 an ecological point of view, showing that their interactions can shift from stabilizing predator-  
94 prey like dynamics to mutually augmenting mutualistic relationship, and show how these shifts  
95 are reflected in normal vs pathological dynamical behaviors. Finally, we show that the proposed  
96 model predicts existence of “long-haulers”, patients with chronic persistent infections, which  
97 have been observed in COVID-19, and that it predicts infection-induced autoimmunity. We

98 conclude with a discussion of next steps and potential experiments to be designed to test  
99 predictions generated by this model to potentially identify patients that may be at a higher risk of  
100 developing a cytokine storm.

101

## 102 **Model Description**

103 The proposed model consists of two subsystems: immune-cytokine subsystem (primary), and  
104 an SIV (susceptible-infected-virus) sub-system (secondary) that serves to provide sufficient  
105 perturbation to the immune-cytokine system to initiate an immune response.

106 Even before running simulations, we would expect to see the following types of responses:

- 107 1) Normal response: after external perturbation to the immune system subsides (infection is  
108 cleared), immune-cytokine populations return to pre-infection equilibrium.
- 109 2) CRS: even though external perturbation to the immune system has subsided (infection  
110 has been cleared), immune cells and cytokines continue affecting each other even in the  
111 absence of external stimulus.

112 Notably, the goal of this work is to describe a mathematical model that can capture and  
113 reproduce these behaviors, and to analyze conditions for when one or the other type of behavior  
114 will occur.

### 115 *Viral subsystem*

116 In order to describe the impact of a viral infection on the immune system, we adapt an SIV  
117 model described in (15). We consider the dynamics of the following 3 variables: susceptible  
118 cells  $S(t)$ , infected cells  $I(t)$  and viral particles  $V(t)$ . We assume that the population of susceptible  
119 cells  $S(t)$  undergoes normal turnover described by  $S_{in} - k_S S(t)$ , and can be infected by the  
120 virus at a rate  $b$ , creating infected cells  $I(t)$ . Infected cells can die at a rate  $k_I$  or can be cleared  
121 by immune cells  $x(t)$  at a rate  $\gamma$ . Viral particles  $V(t)$  are produced by the infected cells  $I(t)$  at a  
122 rate  $v_{in}$  and get cleared at a rate  $k_v$ . These mechanisms are described by system (1)

$$\begin{aligned} \frac{dS}{dt} &= S_{in} - k_s S(t) - \beta V(t) S(t) \\ \frac{dI(t)}{dt} &= \beta V(t) S(t) - k_I I(t) - \gamma x(t) I(t) \\ \frac{dV(t)}{dt} &= v_{in} I(t) - k_V V(t) \end{aligned} \quad (1)$$

123  
124 This proposed model is of course highly simplified and primarily serves the purpose of  
125 introducing a dynamic perturbation to the immune-cytokine subsystem; as such, it will not be  
126 fully analyzed. It is used here instead of a simple mechanical perturbation to the immune-  
127 cytokine subsystem to allow us to describe a variety of situations, such as chronic infection. It  
128 can be modified and adapted to different questions as needed.

129

### 130 *Immune-cytokine subsystem*

131 The following system of equations aims to capture the qualitative aspects of the dynamical  
132 relationship between immune cells  $x(t)$ , and two types of cytokines  $y(t)$  and  $z(t)$  that can regulate  
133 immune activity and that appear to act synergistically in hyperactive immune response (16).

134 First, we describe the dynamics of  $y(t)$ , which are involved in direct regulation of T cells;  
135 these can be interpreted as TNF-alpha or IFN-gamma. We also describe the dynamics of  $z(t)$ ,  
136 which can stimulate production of  $y(t)$  and thus indirectly regulate immune cells  $x(t)$ ; these  
137 species can be interpreted as interleukins, such as IL-6.

138 We assume that cytokines  $y(t)$  have a normal turnover rate and thus maintain an  
139 infection-free baseline level  $y^* = \frac{y_{in}}{k_2}$ . We assume that interleukins  $z(t)$  are produced in  
140 response to interactions between immune cells  $x(t)$  and cytokines  $y(t)$ , and are cleared at a  
141 natural rate  $a_2$ . Finally, the dynamics of immune cells  $x(t)$  is described as follows: we assume  
142 that immune cells have a normal turnover rate to maintain a normal infection-free level  $x^*$ .  
143 Immune cell population can additionally increase in response to infection, as captured by the  
144 term  $\gamma x(t) I(t)$ . Finally, we assume that there exists a threshold  $m$ , beyond which immune cells  
145 receive an additional growth boost; we interpret the existence of threshold  $m$  to be with in  
146 accordance with the second touch hypothesis (17), where antigen-experienced T cells require a  
147 “second touch” by the necessary antigen to achieve full immune activation, resulting in part in a

148 delay between antigen encounter and immune cell expansion. The duration of additional  
 149 immune cell expansion is regulated by cytokines  $y(t)$  as follows: we assume that there exists a  
 150 range of concentrations of  $y(t)$  that acts as immune stimulatory, and a concentration that can  
 151 become immune inhibitory. We assume that the immune cells have an additional positive  
 152 growth term when concentration of cytokines is between  $y_1 < y(t) < y_2$ , thereby capturing in a  
 153 phenomenological way the dual regulatory and inhibitory property of cytokines on the immune  
 154 system.

155 The resulting system then takes the following form:

$$\begin{aligned}
 \underbrace{\frac{dx(t)}{dt}}_{\text{immune cells}} &= \underbrace{x_{in} - k_1 x(t)}_{\text{normal turnover}} + \underbrace{\gamma_1 x(t) I(t)}_{\text{inflow from infection}} + \underbrace{b_1 \frac{x(t)}{c_1 + x(t)} (m - x(t)) (y_1 - y(t)) (y(t) - y_2)}_{\substack{\text{immune cells } x \text{ undergo expansion when above threshold } m; \\ \text{upper bound for growth is regulated by cytokines}}} \\
 \underbrace{\frac{dy(t)}{dt}}_{\substack{\text{cytokines} \\ \text{(i.e., IFN-g/} \\ \text{TNF-a)}}} &= \underbrace{y_{in} - k_2 y(t)}_{\text{normal turnover}} + \underbrace{b_2 z(t)}_{\substack{\text{immune cells} \\ \text{stimulate cytokines}}} \\
 \underbrace{\frac{dz(t)}{dt}}_{\substack{\text{interleukins} \\ \text{(i.e., IL-6,8,10)}}} &= a_1 y(t) \frac{x(t)}{c_2 + x(t)} - a_2 z(t)
 \end{aligned} \tag{2}$$

157 Schematic representation of this model structure is given in Figure 1A. Notably, disease-free  
 158 equilibrium has to satisfy  $x^* < m$ , which is necessary to capture antigen-induced immune cell  
 159 expansion.

160

161 Next, we assume that compared to the dynamics of the immune cells  $x(t)$ , the  $y$ - $z$   
 162 subsystem reaches a quasi-steady state before it can affect immune cells  $x(t)$ .

163 Therefore, taking  $\frac{dz(t)}{dt} = 0$  leads to interleukins  $z(t)$  reaching a quasi-steady state

164  $z^* = \frac{a_1 y(t) x(t)}{a_2 c_2 + x(t)}$ . Substituting this expression into System (2), we get the following 2-

165 dimensional system of equations, describing interactions between immune cells and cytokines:

$$\begin{aligned}
 \frac{dx(t)}{dt} &= \underbrace{x_{in}}_{\text{immune}} - \underbrace{k_1 x(t)}_{\text{normal turnover}} + \underbrace{\gamma_1 x(t) I(t)}_{\text{inflow from infection}} + b_1 \underbrace{\frac{x(t)}{c_1 + x(t)} (x(t) - m) (y_1 - y(t)) (y(t) - y_2)}_{\substack{\text{immune cells } x \text{ grow additionally when above threshold } m; \\ \text{upper bound is regulated by cytokines}}} \\
 \frac{dy(t)}{dt} &= \underbrace{y_{in}}_{\text{cytokines}} - \underbrace{k_2 y(t)}_{\text{normal turnover}} + \underbrace{b_2 z^*(t)}_{\substack{\text{immune cells} \\ \text{stimulate cytokines}}} = \underbrace{y_{in}}_{\text{normal turnover}} - \underbrace{k_2 y(t)}_{\text{normal turnover}} + b_2 \underbrace{\frac{a_1 y(t) x(t)}{a_2 c_2 + x(t)}}_{\substack{\text{immune cells} \\ \text{stimulate cytokines}}}
 \end{aligned}
 \tag{3}$$

167 Schematic representation of this reduced system is shown in Figure 1B.

168 Final system of equations becomes

$$\begin{aligned}
 \frac{dS}{dt} &= S_{in} - k_s S(t) - \beta V(t) S(t) \\
 \frac{dI(t)}{dt} &= \beta V(t) S(t) - k_I I(t) - \gamma x(t) I(t) \\
 \frac{dV(t)}{dt} &= v_{in} I(t) - k_V V(t) \\
 \frac{dx(t)}{dt} &= x_{in} - k_1 x(t) + \gamma_1 x(t) I(t) + b_1 \frac{x(t)}{c_1 + x(t)} (x(t) - m) (y_1 - y(t)) (y(t) - y_2) \\
 \frac{dy(t)}{dt} &= y_{in} - k_2 y(t) + b_2 \frac{a_1 y(t) x(t)}{a_2 c_2 + x(t)}
 \end{aligned}
 \tag{4}$$

170



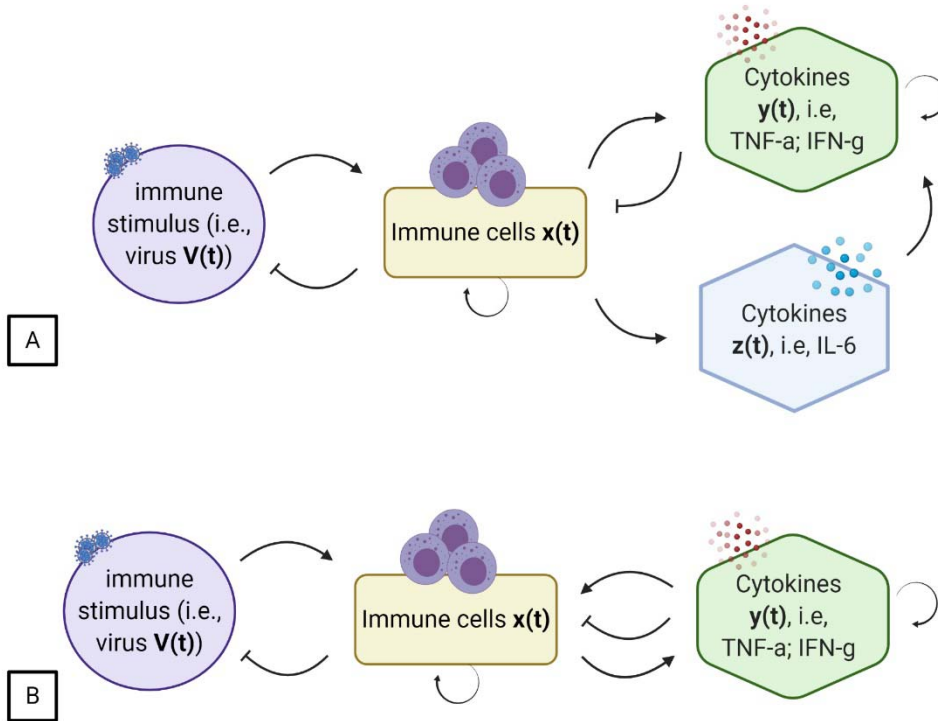

171

172 **Figure 1.** Schematic representation of immune-cytokine interactions subject to perturbation by  
173 infection. (A) Full system as described by Equations (1) and (2). (B) Mechanisms described by  
174 System (4).

175

176

177 The final System (4) captures the following set of key mechanisms:

- 178 1) Viral subsystem serves to provide a stimulus to the immune system that has the  
179 potential to trigger cytokine storm in the immune-cytokine subsystem  $x$ - $y$ .  
180 2) Immune cells  $x(t)$  undergo additional expansion only after threshold  $m$  is crossed.  
181 3) Once the threshold  $m$  is crossed, cytokines regulate the degree of immune cell  
182 expansion as determined by the values of parameters  $y_1$  and  $y_2$ .

183

184 Simulations are conducted as follows. The system is allowed to reach a steady state before  
185 infection is introduced at time  $t=500$  (value chosen arbitrarily to ensure sufficient time for the  
186 model to reach a steady state). After the infection is introduced, we observe the resulting  
187 trajectories of immune cells  $x(t)$  and cytokines  $y(t)$ , as well as the impact of the immune system  
188 on the infection.

189 Due to the phenomenological nature of the proposed model, parameter values were chosen  
 190 arbitrarily in order to capture qualitatively different behaviors; furthermore, since the model is not  
 191 fit to specific data, units are chosen to be generic units of volume and time that can be specified  
 192 when necessary for the purposes of a specific data set. A summary of default parameter values  
 193 used in the simulations is given in Table 1.

194

195 **Table 1.** Parameters used in System (4). Parameter values were chosen arbitrarily to allow to  
 196 capture qualitatively different behaviors. Parameters  $a_1$  and  $a_2$  are taken as 1.

| <i>Parameter</i> | <i>Description</i>                                                                                                          | <i>Value</i> | <i>Units</i>                |
|------------------|-----------------------------------------------------------------------------------------------------------------------------|--------------|-----------------------------|
| $S(0)$           | Initial size of population of susceptible cells                                                                             | 1            | vol.                        |
| $I(0)$           | Initial size of population of infected cells                                                                                | 0            | vol.                        |
| $V(0)$           | Initial size of population of virus particles                                                                               | 0            | vol.                        |
| $x(0)$           | Initial size of population of immune cells                                                                                  | 0.07         | vol.                        |
| $y(0)$           | Initial size of population of cytokines                                                                                     | 0.18         | vol.                        |
| $S_{in}$         | Production rate of susceptible cells, $S(0) \times k_s$                                                                     | 0.01         | vol./time                   |
| $k_s$            | Normal decay rate of susceptible cells                                                                                      | 0.01         | 1/time                      |
| $k_I$            | Normal decay rate of infected cells                                                                                         | 0.01         | 1/time                      |
| $\gamma$         | Rate of elimination of infected cells by immune cells                                                                       | 0.5          | 1/vol/time                  |
| $v_{in}$         | Rate of viral replication in infected cells                                                                                 | 0.1          | 1/time                      |
| $k_v$            | Natural virus decay rate                                                                                                    | 0.1          | 1/time                      |
| $\beta$          | Rate at which virus infects susceptible cells                                                                               | 0.1          | 1/vol./time                 |
| $x_{in}$         | Normal production of immune cells, $x(0) \times k_1$                                                                        | 7e-4         | vol./time                   |
| $k_1$            | Normal decay rate of immune cells                                                                                           | 0.01         | 1/time                      |
| $\gamma_1$       | Conversion of immune cell kill of infected cells into immune cell proliferation                                             | 0.05         | 1/vol/time                  |
| $m$              | Threshold of activation of additional immune cell proliferation (second touch)                                              | 0.1          | vol.                        |
| $y_{in}$         | Cytokine production rate, $y(0) \times k_2$                                                                                 | 0.018        | vol./time                   |
| $y_1$            | Cytokine-mediated threshold of immune cell expansion                                                                        | 1            | vol.                        |
| $y_2$            | Cytokine-mediated threshold of immune cell regulation                                                                       | 3            | vol.                        |
| $b_1$            | Rate of additional immune cell expansion as mitigated by cytokines                                                          | 1            | 1/(time*vol. <sup>3</sup> ) |
| $b_2$            | Rate of cytokine stimulation by immune cells                                                                                | 1            | 1/time                      |
| $k_2$            | Normal cytokine decay rate                                                                                                  | 0.1          | 1/time                      |
| $c_1$            | Population size that results in half-maximal growth of $x(t)$ in response to cytokine stimulation                           | 1            | vol.                        |
| $c_2$            | Population size that results in half-maximal increase in production of cytokines in response to stimulation by immune cells | 1            | vol.                        |

197

198 **Results**

199 *Dynamical regimes*

200 Initial numerical analysis is performed through variation of parameter  $b_2$ , which represents the  
 201 impact of immune cells on cytokine production; all other parameters were fixed at values  
 202 defined in Table 1 unless indicated otherwise.

203 *Norm*

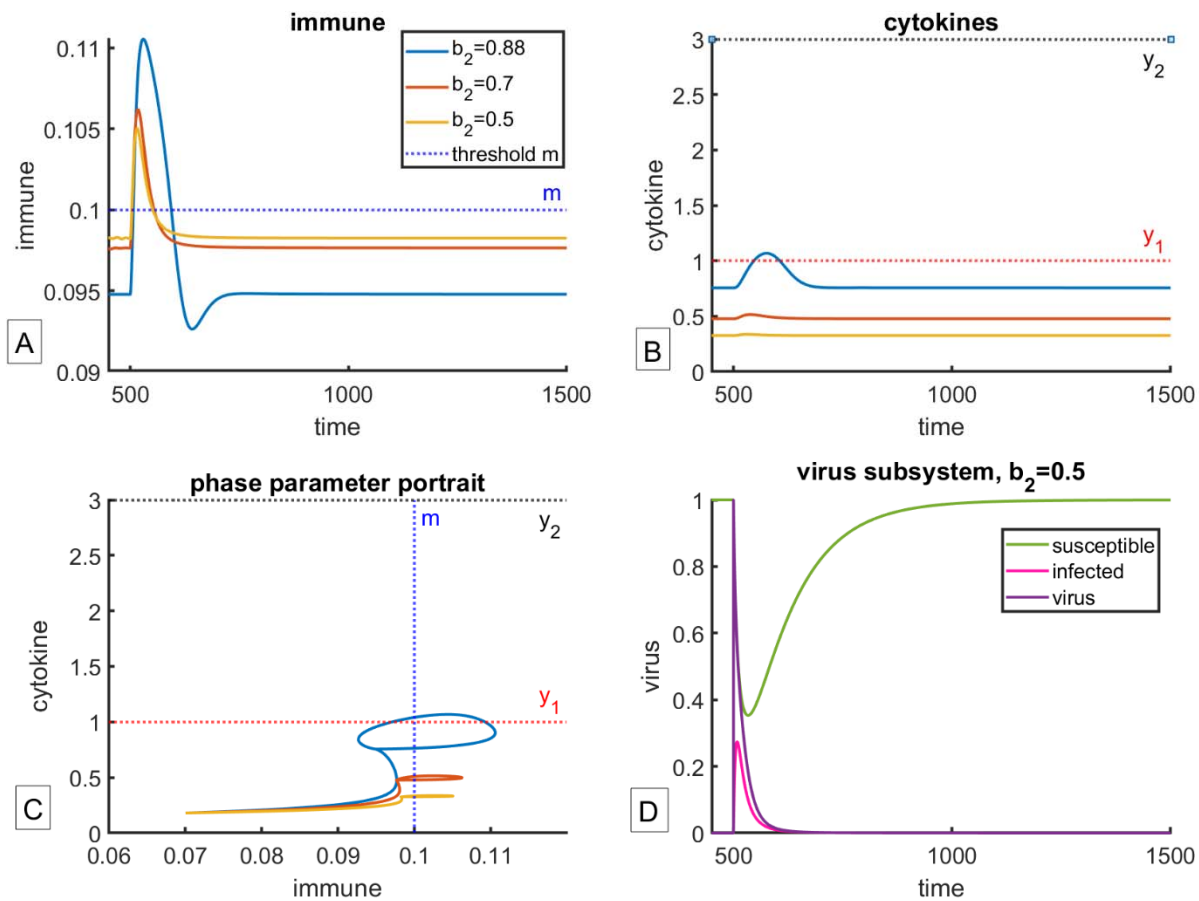

204

205 **Figure 2.** Normal immune response to infection. Infection is introduced at time  $t=500$ ; parameter  
 206  $b_2$  is increased from 0.5 to 0.7 to 0.88. All other parameters are held constant at values reported  
 207 in Table 1. (A) Dynamics of immune cells  $x(t)$ . (B) Dynamics of cytokines  $y(t)$ . (C) Phase  
 208 parameter-portrait of the  $x$ - $y$  subsystem. (D) Dynamics of the virus subsystem for  $b_2=0.5$ ; curves  
 209 are qualitatively similar for other values of parameter  $b_2$ . After the infection is introduced, the  
 210 number of susceptible cells decreases, and the number of infected cells increases. This results  
 211 in increase in immune cells  $x(t)$  as population size surpasses threshold  $m$ , followed by increase  
 212 in cytokines  $y(t)$ . After the infection is cleared, immune cells and cytokines return to pre-infection  
 213 equilibrium.

214

215 In the first set of simulations we observe expected dynamical behaviors for a normal immune  
216 response. Infection at time  $t=500$  is assumed to be sufficiently immunogenic to cause increase  
217 in the size of the population of immune cells  $x(t)$  for them to surpass threshold  $m$ , which now  
218 leads to additional immune cell expansion (Figure 2A). As a result, the number of cytokines  $y(t)$   
219 increases as well (Figure 2B). Even though for  $b_2=0.88$ , the concentration of  $y(t)$  surpasses  
220 threshold  $y_1$ , it is not sufficient to initiate additional immune proliferation, and the system quickly  
221 returns to equilibrium. The phase-parameter portrait of immune-cytokine interactions is shown in  
222 Figure 2C. The immune response is sufficient to clear the infection, as can be seen in Figure  
223 2D.

224 Notably, there exists an inverse relationship between baseline levels of immune cells  $x(t)$   
225 and cytokines  $y(t)$ , with lower baseline levels of immune cells corresponding to higher baseline  
226 levels of cytokines. While mathematically, this relationship is clearly affected by changes in  
227 parameter  $b_2$ , it may also be capturing age-related changes in immune-cytokine balance, with  
228 the number of immune cells declining with age, coupled with increased levels of inflammatory  
229 cytokines (18). This hypothesis is supported by the observation that older people may be more  
230 susceptible to cytokine storms, at least in case of COVID-19 (19).

231

### 232 *Storm*

233 As we increase the value of parameter  $b_2$ , we observe a qualitative change in system behavior,  
234 where immune cells and cytokines start amplifying each other, as can be seen in Figure 3  
235 (unless indicated otherwise, in all of the cases shown, the immune system is capable of clearing  
236 the virus, and thus the panel with the viral subsystem is not shown). As one can see in Figure  
237 3A, for  $b_2=0.89$ , infection-induced perturbation to the immune system causes a dramatic spike in  
238 immune cell population size, leading to subsequent spike in the population of cytokines (Figure  
239 3B), behavior which we interpret as cytokine storm. The phase parameter portrait of the  $x$ - $y$   
240 interactions is shown in Figure 3C. While the population eventually returns to equilibrium, it  
241 should be noted that after the spike, the model predicts a dip in immune population size before it  
242 equilibrates; this prediction remains to be confirmed against experimental observations.

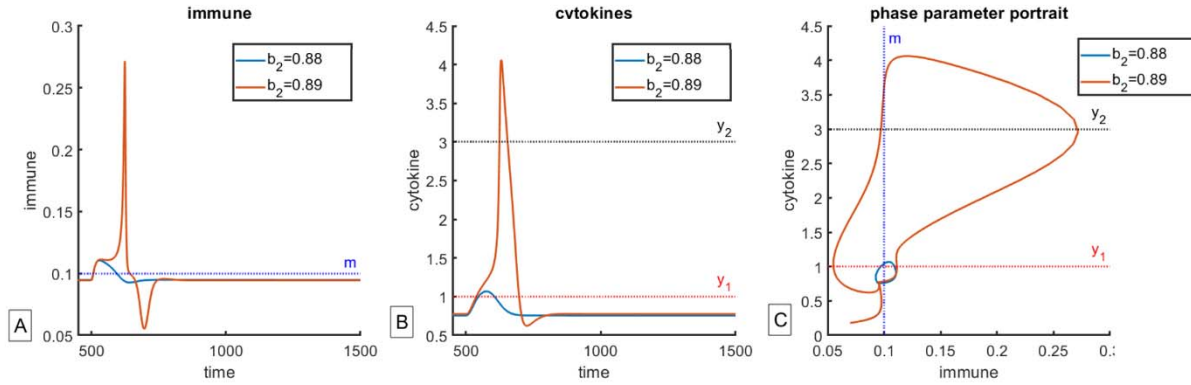

243

244 **Figure 3.** Normal vs storm-like response to infection. As parameter  $b_2$  increases from 0.88  
 245 0.89, qualitative change in behavior is observed, as immune cells  $x(t)$  and cytokines  $y(t)$  start  
 246 augmenting each other's behavior. Infection is introduced at time  $t=500$ ; parameter  $b_2$  is  
 247 increased from 0.88 to 0.89. All other parameters are held constant at values reported in Table  
 248 1. (A) Dynamics of immune cells  $x(t)$ . (B) Dynamics of cytokines  $y(t)$ . (C) Phase parameter-  
 249 portrait of the  $x$ - $y$  subsystem. Dynamics of the virus subsystem is not reported as it is  
 250 qualitatively similar to one reported in Figure 2D.

251

### 252 *Storms of different magnitude*

253 As we further increase the value of parameter  $b_2$ , we observe that the magnitude of the  
 254 predicted cytokine storm changes, as does its duration (Figure 4). Moreover, increase in the  
 255 value of parameter  $b_2$ , which represents the magnitude of cytokine stimulation by the immune  
 256 cells, results in less severe storms, as can be clearly seen through both the maximal size  
 257 reached by population of immune cells (Figure 4A), and the size of the characteristic storm-like  
 258 loop as seen on the phase parameter portrait in Figure 4C.

259

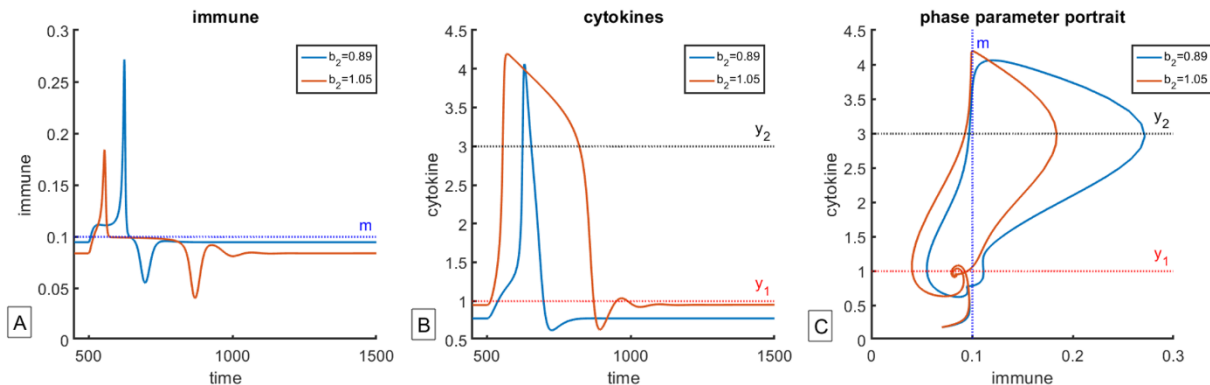

260

261 **Figure 4.** Storms of varying magnitude. As the value of parameter  $b_2$  increases from 0.89 to  
 262 1.05, one can observe storm-like behavior, but the magnitude of the predicted storm is different  
 263 depending on the value of  $b_2$ . Infection is introduced at time  $t=500$ . All other parameters are held  
 264 constant at values reported in Table 1. (A) Dynamics of immune cells  $x(t)$ . (B) Dynamics of  
 265 cytokines  $y(t)$ . (C) Phase parameter-portrait of the  $x$ - $y$  subsystem. Dynamics of the virus  
 266 subsystem is not reported as it is qualitatively similar to one reported in Figure 2D.

267

268

269 The explanation for this observation lies in timing, and specifically, the amount of time that the  
 270 population of cytokines  $y(t)$  spends between thresholds  $y_1$  and  $y_2$  (Figure 5). Larger  $b_2$  results in  
 271 increased production of cytokines  $y(t)$ , and so they reach the inhibitory concentration faster than  
 272 for smaller values of  $b_2$ , resulting in a shorter and less severe storm-like behavior.

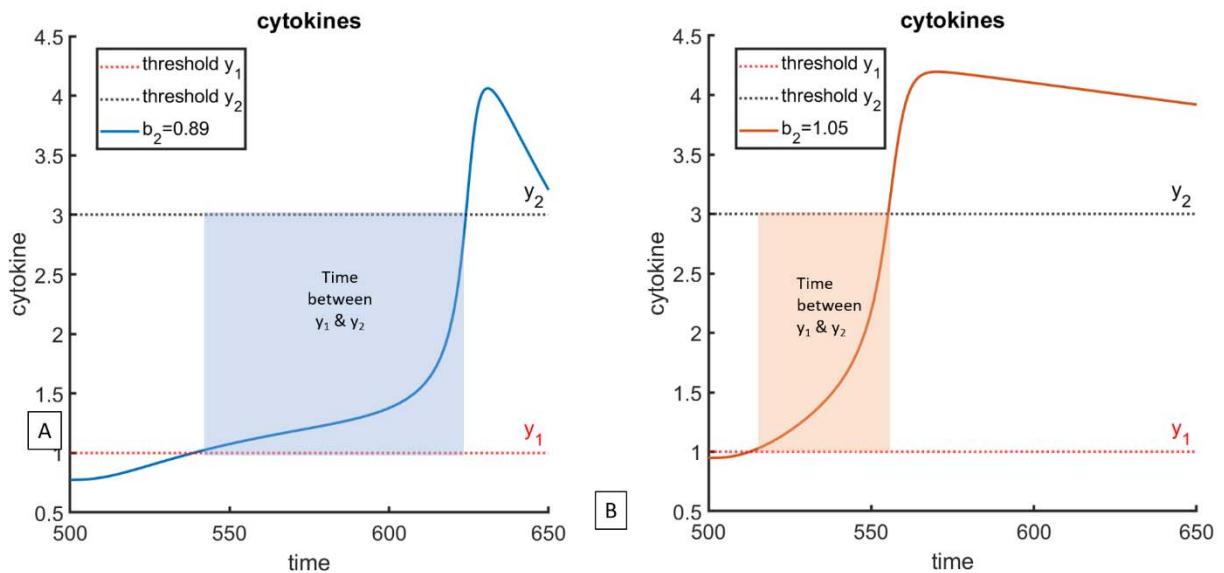

273

274 **Figure 5.** Timing as the key to variations in storm magnitude. (A) Time between thresholds  $y_1$   
 275 and  $y_2$  for  $b_2=0.89$ . (B) Time between thresholds  $y_1$  and  $y_2$  for  $b_2=1.05$ . Since  $b_2$  represents  
 276 stimulation of cytokines by the immune cells, larger values of  $b_2$  result in faster time between  
 277 thresholds  $y_1$  and  $y_2$ , resulting in a storm of a smaller magnitude.

278

279 *New norm*

280 Finally, as we further increase the value of parameter  $b_2$ , we observe the population reaching a  
 281 new equilibrium, with population of immune cells  $x(t)$  equilibrating at the threshold  $m$ , which is  
 282 higher than pre-disease baseline; in this case, cytokines equilibrate above threshold  $y_2$  (Figure

283 6). We propose that this behavior can be interpreted as infection-induced autoimmunity, a  
 284 phenomenon that has been previously reported in the literature (20).

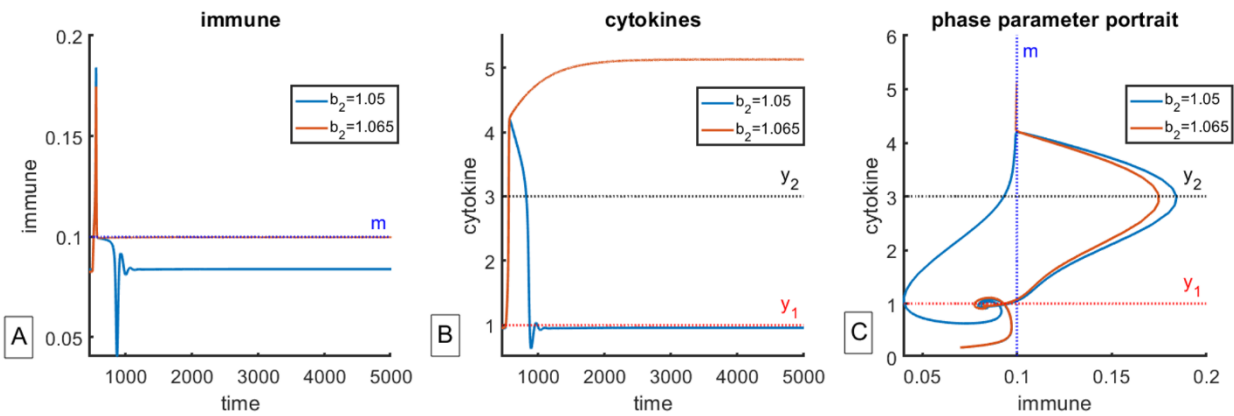

285

286 **Figure 6.** New norm. As the value of parameter  $b_2$  increases from 1.05 to 1.065, one can  
 287 observe shift towards a new equilibrium, where immune cells  $x(t)$  equilibrate at threshold  $m$ , and  
 288 cytokines  $y(t)$  equilibrate above threshold  $y_2$ . Infection is introduced at time  $t=500$ . All other  
 289 parameters are held constant at values reported in Table 1. (A) Dynamics of immune cells  $x(t)$ .  
 290 (B) Dynamics of cytokines  $y(t)$ . (C) Phase parameter-portrait of the  $x$ - $y$  subsystem. Dynamics of  
 291 the virus subsystem is not reported as it is qualitatively similar to one reported in Figure 2D.

292

### 293 *Sequence of dynamical regimes*

294 Next, we wanted to capture the impact on system dynamics of variation of parameter  $b_1$ , which  
 295 represents the rate at which cytokines  $y(t)$  stimulate immune system  $x(t)$ ; all other parameters  
 296 were held constant at values given in Table 1. The result is shown in Figure 7, which reveals a  
 297 sequence of dynamical regimes, where cytokine storm is a transient regime that can become  
 298 realized when several conditions are met. Specifically, we have shown that for low  $b_1$ , the  
 299 immune response is insufficient to clear the infection (region 0), regardless of the value of  $b_2$ .  
 300 Once the value of  $b_1$  is sufficiently large, we can observe that increasing  $b_2$  leads first to normal  
 301 response (region 1), after which the immune system quickly returns to pre-disease equilibrium.  
 302 As we increase  $b_2$ , we observe storm-like behavior, with smaller  $b_2$  predicting more severe  
 303 storms due to longer time spent between thresholds  $y_1$  and  $y_2$  (region 2). Further increase in  $b_2$   
 304 leads to less severe storms because of shorter time spent between  $y_1$  and  $y_2$  (region 3). Finally,  
 305 further increase of  $b_2$  results in what we term a “new norm”, or infection-induced autoimmunity  
 306 (region 4).



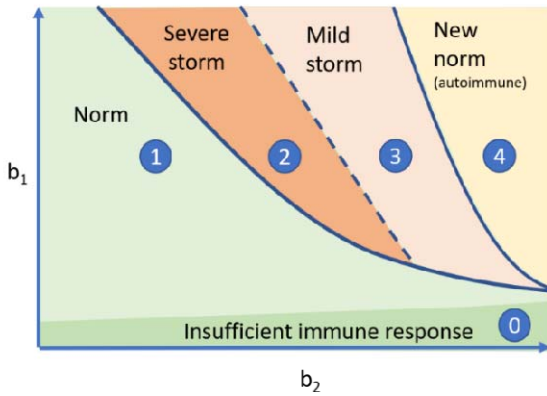

307

308 **Figure 7.** Sequence of regimes predicted by the model, subject to variation of parameters  $b_1$   
 309 and  $b_2$ , where cytokine storm is revealed to be a transient regime.

310

311 *Conditions corresponding to storm-like behavior*

312 Additional insights into observed behaviors can be obtained from analysis of isoclines and the  
 313 change in their relative positions depending on values of parameters within the relevant  
 314 parameter space; parameter values are held at values reported in Table 2 unless indicated  
 315 otherwise. Recall that we are only considering the case when stable disease-free equilibrium is  
 316 such that  $x^* < m$ , and additional immune cell expansion only occurs after this threshold is passed  
 317 as a result of perturbation, either from infection or any other cause.

318 Isoclines for System (3) are given by

$$\begin{aligned}
 319 \quad Is_1 : y &= \frac{1}{2} \left( y_1 + y_2 - \sqrt{\frac{b_1 x (x - m) \left( 4(1 + x)(x_{in} - k_1 x) - b_1 (m - x)x (y_1 - y_2)^2 \right)}{b_1 (m - x)x}} \right), \\
 Is_2 : y &= \frac{1}{2} \left( y_1 + y_2 + \sqrt{\frac{b_1 x (x - m) \left( 4(1 + x)(x_{in} - k_1 x) - b_1 (m - x)x (y_1 - y_2)^2 \right)}{b_1 (m - x)x}} \right), \quad (5) \\
 Is_3 : y &= \frac{(1 + x)y_{in}}{k_2 - b_2 x + k_2 x}.
 \end{aligned}$$

320 Depending on parameter values, isoclines can have between one and three points of  
 321 intersection. As one can see in Figure 8, there always exists one stable equilibrium, a nodal  
 322 sink, which corresponds to infection-free immune-cytokine balance. Additionally, there can exist  
 323 two more equilibrium points, a spiral source and a saddle point, which exist for small values of



324  $b_2$  (Figure 8A); as  $b_2$  increases, the source and the saddle merge (Figure 8B) and eventually  
 325 disappear (Figure 8C), resulting in existence only of the nodal sink.

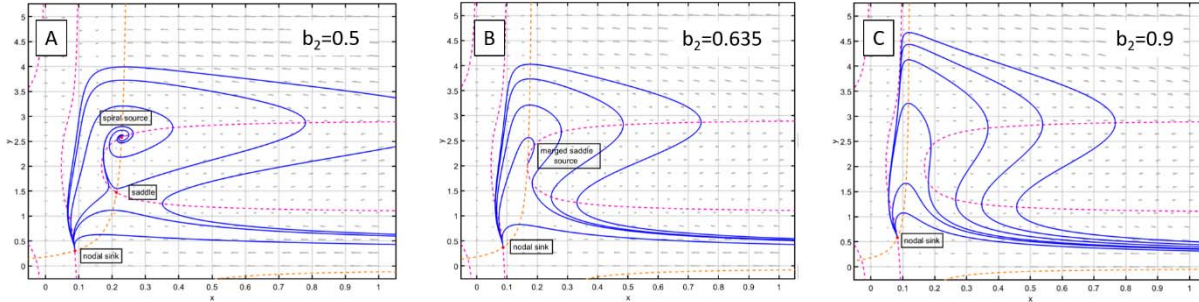

326

327 **Figure 8.** Isocline analysis of immune-cytokine subsystem (3). (A) For smaller  $b_2$ , there can  
 328 exist 3 equilibrium points, one stable node, one spiral source and a saddle point. (B) As the  
 329 value of  $b_2$  increases, saddle and source merge into a single point. (C) As  $b_2$  increases further,  
 330 only one equilibrium point remains. We observe that storm-like dynamics occurs only when  
 331 there exists a single equilibrium point.

332

333 In this system, we observed that storm-like dynamics occur only when there exists only one  
 334 equilibrium point (Figure 8C).

335

### 336 Ecological perspective

337 To further our understanding of this system, we analyze it from the perspective of community  
 338 modules, which are frequently used in ecological systems (21). Consider partial derivatives of  
 339 immune-cytokine subsystem (3):

340

$$\begin{pmatrix} a_{11} & a_{12} \\ a_{21} & a_{22} \end{pmatrix}, \quad \text{where}$$

$$a_{11} = \gamma_1 I(t) - k_1 + b_1(y - y_1)(y - y_2) \left(1 - \frac{1+m}{(1+x)^2}\right)$$

$$a_{12} = \frac{b_1(m-x)x(2y - y_1 - y_2)}{1+x}$$

$$a_{21} = \frac{a_1 b_2}{a_2} \left(\frac{y}{(1+x)^2}\right)$$

$$a_{22} = \frac{a_1 b_2}{a_2} \frac{x}{(1+x)} - k_2$$

341 Recall from (21) that if  $a_{21}$  is  $> 0$ , depending on the sign of  $a_{12}$ , the relationship between the two  
 342 variables can be either mutualistic if  $a_{21}>0$ , or predator-prey if  $a_{12}<0$ . In a mutualistic system,  
 343  $\begin{pmatrix} a_{11} & + \\ + & a_{22} \end{pmatrix}$ , populations amplify each other, while in a predator-prey type system,  $\begin{pmatrix} a_{11} & - \\ + & a_{22} \end{pmatrix}$ ,  
 344 the two interacting populations regulate each other. Within the context of the proposed immune-  
 345 cytokine System (3), one can classify observed dynamical regimes depending on the sign of  $a_{12}$   
 346 as follows.

347 The two populations are in a mutualistic relationship when  $x < m, y > \frac{y_1 + y_2}{2}$  or when  
 348  $x > m, y < \frac{y_1 + y_2}{2}$ ; in this case, immune cells  $x(t)$  and cytokines  $y(t)$  amplify each other, which  
 349 corresponds to regions of accelerated immune and cytokine population size increase as  
 350 observed in Figure 9. The two populations are in a predator-prey type relationship if  
 351  $x < m, y < \frac{y_1 + y_2}{2}$  or  $x > m, y > \frac{y_1 + y_2}{2}$ ; in this case cytokines act as regulators and  
 352 “dampeners” of immune response. Notably, if  $a_{12}=0$ , then the two populations are in a  
 353 commensal relationship, where cytokines  $y(t)$  benefit from the interactions but cause neither  
 354 increase nor decrease to the immune population size. This occurs when  $x = m$  or  $y = \frac{y_1 + y_2}{2}$ , a  
 355 behavior we observe in the “new norm” region of Figure 7.

356 These results are summarized in Table 2 and visualized in Figure 9.

357

358 **Table 2.** Ecological relationships between immune cells  $x(t)$  and cytokines  $y(t)$ .

| Relationship | Commensalism                                                              | Mutualism                                                                    | Predator-prey                                                                |
|--------------|---------------------------------------------------------------------------|------------------------------------------------------------------------------|------------------------------------------------------------------------------|
| Dynamics     | cytokines $y(t)$ benefit from interaction but cause neither good nor harm | immune cells $x(t)$ and cytokines $y(t)$ amplify each other                  | Immune cells $x(t)$ and cytokines $y(t)$ regulate each other                 |
| Conditions   | $x = m$ or $y = \frac{y_1 + y_2}{2}$                                      | $x < m$ or $x > m$<br>$y > \frac{y_1 + y_2}{2}$ or $y < \frac{y_1 + y_2}{2}$ | $x < m$ or $x > m$<br>$y < \frac{y_1 + y_2}{2}$ or $y > \frac{y_1 + y_2}{2}$ |

359

360 s

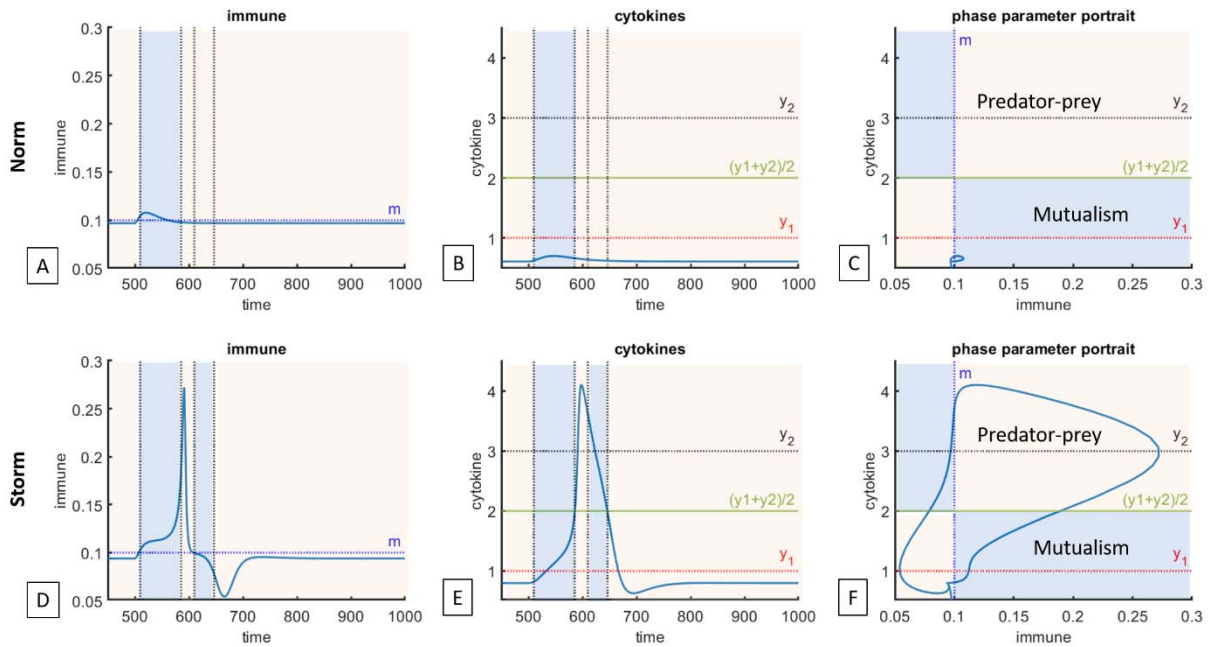

361

362 **Figure 9.** Application of ecological analysis to immune-cytokine trajectories for normal and  
 363 storm-like responses. Boundaries for predator-prey vs mutualism interactions are given in Table  
 364 2. Top panel: norm,  $b_2=0.8$ , other parameters reported in Table 1. Dashed lines correspond to  
 365 conditions when switch from mutualism to predator-prey like behavior can occur. (A) Immune  
 366 cells  $x(t)$ ; (B) cytokines  $y(t)$ ; (C): phase parameter portrait. Normal immune response involves a  
 367 single transition from stabilizing predator-prey type interaction to mutually amplifying mutualist  
 368 and back to stabilizing predator-prey. Bottom panel: cytokine storm,  $b_2=0.9$ . (D) immune cells  
 369  $x(t)$ , (E) cytokines  $y(t)$ , (F) phase-parameter portrait. In a cytokine storm, there exists an  
 370 additional predator-prey to mutualism cycle compared to normal response.

371

372 Notably, this perspective could provide potential additional explanation for why timing matters in  
 373 treatment administration: if a cytokine blocker results in reducing cytokine concentration such  
 374 that the system moves into, or remains in a mutualistic regime, then it may instead amplify the  
 375 severity of immune and cytokine production rather than reduce its impact.

376

### 377 *Impact of parameter $\gamma$ and the severity of infection*

378 Up to this point, we have identified the impact of the following parameters on occurrence of a  
 379 cytokine storm: 1) parameters  $b_1$  and  $b_2$ , which represent the degree to which immune cells and  
 380 cytokines stimulate each other's production, 2) parameter  $m$ , which represents a threshold for

381 additional immune cell expansion, and 3) parameters  $y_1$  and  $y_2$ , which determine a region of  
382 cytokine-induced stimulation or inhibition of additional immune cell expansion.

383 Now we evaluate the impact of responsiveness of immune system to infected cells themselves  
384 as measured through changes in the value of parameter  $\gamma$ . We fix the value of  $b_1$  and vary  
385 parameters  $b_2$  and  $\gamma$  to evaluate whether the infection was cleared, and whether the immune-  
386 cytokine response is normal or storm-like. As one can see in schematic Figure 10, the model  
387 predicts that for large enough values of  $\gamma$ , the infection will be cleared without a cytokine storm;  
388 it also confirms that increase in the value of  $b_2$  can lead to storm-like behavior. Notably, the  
389 model also predicts the possibility of a cytokine storm without infection clearance (figure not  
390 shown, parameter values are  $b_2=0.9$ ,  $\gamma = 0.1$ ,  $b_1=1$ ; other parameters are as reported in Table  
391 1). In this case, the immune system is not efficient in clearing the infection (small  $\gamma$ ) but the  
392 cytokine-immune dynamics are triggered, resulting storm-like dynamics due to a combination of  
393 individual-specific intrinsic factors summarized above.

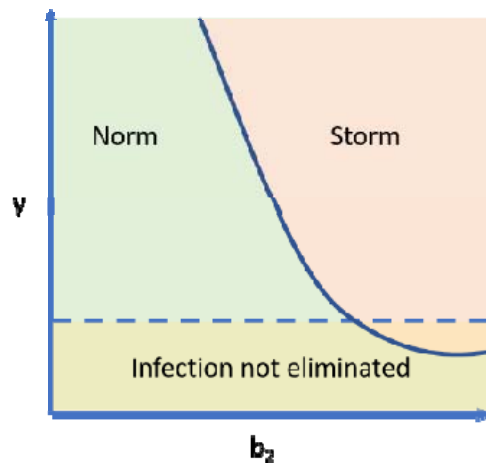

394

395 **Figure 10.** Impact of variation of immunogenicity parameter  $\gamma$  on immune response. It is possible  
396 to observe both normal and storm-like response, with or without infection elimination.

397

### 398 *Chronic infection and the long-haulers*

399 Long-haulers are a subset of patients who develop chronic coronavirus disease (22–24). Within  
400 the frameworks of the proposed model, this behavior is captured as stable non-trivial equilibrium  
401 between all five variables of System (4), as can be seen in Figure 11. Notably, as predicted by  
402 analysis done in Figure 10, this can occur with or without storm-like dynamics.

403

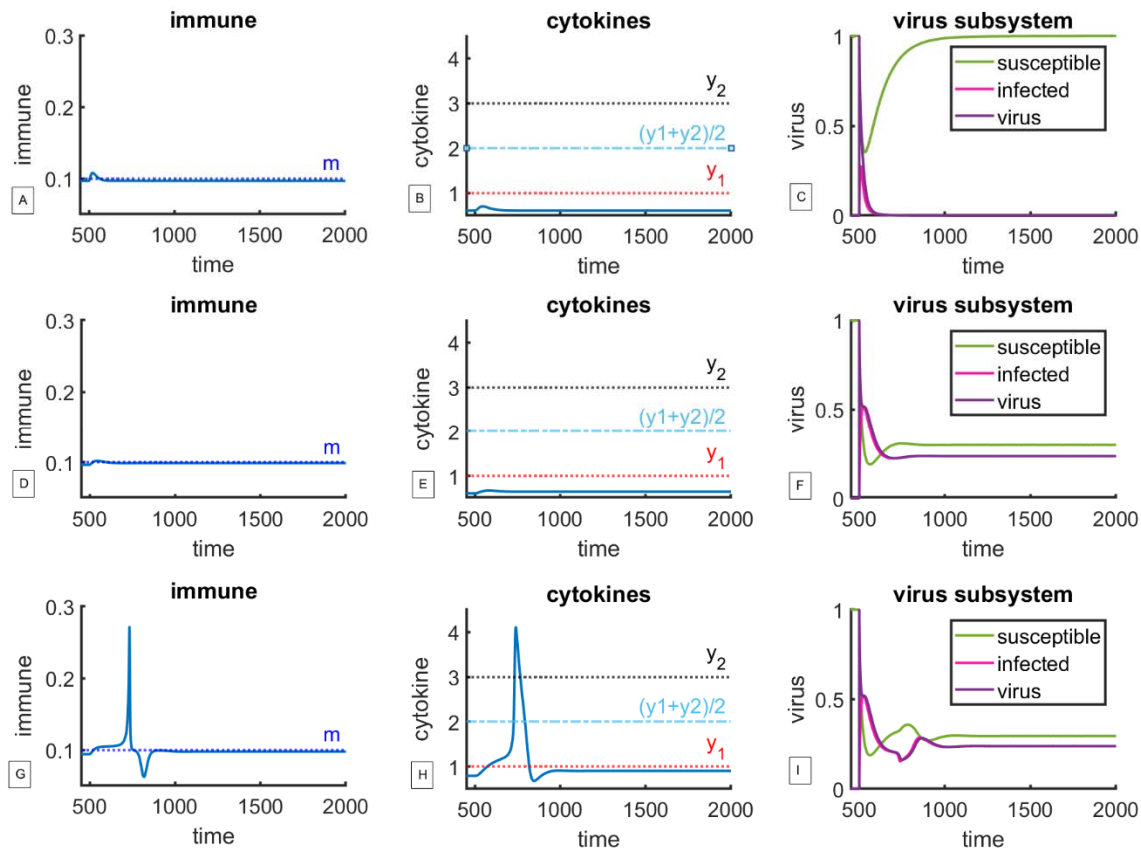

404

405 **Figure 11.** Model predicts possibility of chronic infection (long haulers) with and without cytokine  
 406 storm. Top panel: normal immune response,  $\gamma=0.5$ ,  $b_2=0.8$ , other parameters reported in Table  
 407 1. (A) Immune cells  $x(t)$ , (B) cytokines  $y(t)$ , (C) viral subsystem. Infection is eliminated. Middle  
 408 panel, normal immune response;  $\gamma=0.1$ ,  $b_2=0.8$ . (D) immune cells  $x(t)$ , (E) cytokines  $y(t)$ , (F)  
 409 virus subsystem. Even though immune-cytokine dynamics are normal, the efficiency of infection  
 410 kill is too low, resulting in persistent infection, which can be interpreted as a “long hauler”.  
 411 Bottom panel:  $b_2=0.9$ ,  $\gamma=0.1$ . (G) immune cells  $x(t)$ , (H) cytokines  $y(t)$ , (I) viral subsystem. Even  
 412 though immune-cytokine dynamics show cytokine storm, the efficiency of infection elimination is  
 413 insufficient, suggesting that an individual can go through a cytokine storm and still not clear the  
 414 infection. Note: in figures A, D and G, immune system equilibrates below threshold  $m$ , returning  
 415 to its pre-disease baseline. The y-axis was scaled to enable comparison between the cases.

416

## 417 Discussion

418 Here we propose a conceptual mathematical model of immune-cytokine interactions capable of  
 419 reproducing the qualitative behaviors that capture transition from normal immune response to a  
 420 response that can be interpreted as cytokine storm. The goal of the model was not to describe a

421 particular data set or to incorporate great biological detail but to capture qualitative relationships  
422 between the broad classes of immune cells and cytokines that are sufficient to reproduce these  
423 dynamics, as well as to identify key parameters that may suggest whether an individual may be  
424 susceptible to experiencing a cytokine storm. The proposed model was coupled with a SIV  
425 model that describes immune response to a viral infection and which serves to trigger immune-  
426 cytokine interactions. The viral subsystem serves as a source of perturbation and is not the  
427 focus of the current discussion; it was chosen nevertheless to enable demonstration of various  
428 dynamical regimes, such as chronic infection, and can be substituted by another model tailored  
429 to the question of interest.

430 We show that there exists a parameter-dependent sequence of dynamical regimes  
431 (Figure 7) that describe how immune cells and cytokines stimulate each other in response to  
432 infection as the body tries to mount an appropriately strong immune response while also  
433 avoiding excessive activation. Specifically, we show that as the value of parameter  $b_2$  (extent of  
434 cytokine stimulation by immune cells) increases, we see a transition from normal response  
435 (Figures 2 and 3) to cytokine storm (Figure 4) to a regime that we interpret as infection-induced  
436 autoimmunity (Figure 6). We also demonstrate that counterintuitively, lower  $b_2$  predicts more  
437 severe storm-like behavior due to longer time spent between cytokine-specific thresholds  $y_1$  and  
438  $y_2$  (Figure 5). If the framework proposed here is true, then susceptibility to a cytokine storm is  
439 more likely to be an individual-specific characteristic that may or may not become realized  
440 subject to a challenge to the immune system. The model also predicts the existence of so-called  
441 long-haulers, patients harboring a chronic infection that may or may not be accompanied by  
442 storm-like immune-cytokine dynamics (Figure 11).

443 The proposed immune-cytokine model is reduced to two equations, which allows for  
444 additional analysis. Specifically, a 2-dimensional system was analyzed from the point of view of  
445 ecological community modules, revealing conditions under which the immune cells and  
446 cytokines were in a mutually amplifying mutualistic vs more stabilizing predator-prey type  
447 relationship (Table 2). We were able to show the difference between normal and storm-like  
448 behavior from the point of view of switching between the two types of ecological relationships  
449 (Figure 9), where an additional mutualistic phase amplifies storm-like behavior.

450 Through our analysis, we demonstrate that within the frameworks of the proposed model,  
451 cytokine storm is a transient regime that can become realized when the following individual and  
452 infection- specific conditions are met:

- 453 1) when baseline level of immune cells is close to activation threshold  $m$ ,  
454 2) when cytokines spend a lot of time between thresholds  $y_1$  and  $y_2$ , either because the two  
455 thresholds are far apart, or when the value of parameter  $b_2$  is small, and  
456 3) when the infection is sufficiently immunogenic.

457 Even through here the perturbation to immune-cytokine equilibrium was achieved using a  
458 viral subsystem, other model variations can be used in future work, including simulations of  
459 impact of therapeutic agents that are known to have a high likelihood of cytokine storm reaction,  
460 such as bispecific T cell engagers (BiTEs) or CAR-T cell therapies (5,6,25,26). Furthermore,  
461 since two of the three identified factors that can result in a storm-like reaction to an  
462 immunological challenge are individual-specific, it is likely that they can be leveraged during  
463 patient selection process for such therapies if a sufficiently robust approach to estimating these  
464 qualities can be found, such as genetic factors that may serve as predictive biomarkers (27). It  
465 is our hope that the proposed model can help narrow down the list of possible culprits  
466 responsible for cytokine storms and guide additional research into ways that it can be mitigated.

467

468

469

## 470 **Acknowledgements**

471 The authors would like to thank Fred Adler and Joel Brown for looking over the earlier drafts of  
472 the model and providing valuable comments and insights.

473

## 474 **Conflicts of Interest**

475 IK is an employee of EMD Serono, US subsidiary of Merck KGaA. Views expressed in this  
476 manuscript are author's personal views and do not necessarily represent the views of EMD  
477 Serono.

478

479

480



481 **References**

- 482 1. Ye Q, Wang B, Mao J. The pathogenesis and treatment of the Cytokine Storm in COVID-  
483 19. *Journal of Infection*. Elsevier; 2020;80(6):607–613.
- 484 2. Ferrara JL. Cytokine dysregulation as a mechanism of graft versus host disease. *Current*  
485 *Opinion in Immunology*. Elsevier; 1993;5(5):794–799.
- 486 3. Huang K-J, Su I-J, Theron M, Wu Y-C, Lai S-K, Liu C-C, et al. An interferon- $\gamma$ -related  
487 cytokine storm in SARS patients. *Journal of Medical Virology*. Wiley Online Library;  
488 2005;75(2):185–194.
- 489 4. Oxford JS, Gill D. Unanswered questions about the 1918 influenza pandemic: origin,  
490 pathology, and the virus itself. *The Lancet Infectious Diseases*. Elsevier;  
491 2018;18(11):e348–e354.
- 492 5. Porter D, Frey N, Wood PA, Weng Y, Grupp SA. Grading of cytokine release syndrome  
493 associated with the CAR T cell therapy tisagenlecleucel. *Journal of Hematology &*  
494 *Oncology*. Springer; 2018;11(1):35.
- 495 6. Chen X, Kamperschroer C, Wong G, Xuan D. A Modeling Framework to Characterize  
496 Cytokine Release upon T-Cell–Engaging Bispecific Antibody Treatment: Methodology and  
497 Opportunities. *Clinical and Translational Science*. Wiley Online Library; 2019;12(6):600–  
498 608.
- 499 7. Suntharalingam G, Perry MR, Ward S, Brett SJ, Castello-Cortes A, Brunner MD, et al.  
500 Cytokine storm in a phase 1 trial of the anti-CD28 monoclonal antibody TGN1412. *New*  
501 *England Journal of Medicine*. Mass Medical Soc; 2006;355(10):1018–1028.
- 502 8. Fajgenbaum DC, June CH. Cytokine storm. *New England Journal of Medicine*. Mass  
503 *Medical Soc*; 2020;383(23):2255–2273.
- 504 9. Tisoncik JR, Korth MJ, Simmons CP, Farrar J, Martin TR, Katze MG. Into the eye of the  
505 cytokine storm. *Microbiology and Molecular Biology Reviews*. Am Soc Microbiol;  
506 2012;76(1):16–32.
- 507 10. Waito M, Walsh SR, Rasiuk A, Bridle BW, Willms AR. A mathematical model of cytokine  
508 dynamics during a cytokine storm. *Mathematical and Computational Approaches in*  
509 *Advancing Modern Science and Engineering*. Springer; 2016. p. 331–339.
- 510 11. Yiu HH, Graham AL, Stengel RF. Dynamics of a cytokine storm. *PloS one*. Public Library  
511 *of Science*; 2012;7(10):e45027.
- 512 12. Hopkins B, Tucker M, Pan Y, Fang N, Huang ZJ. A model-based investigation of cytokine  
513 storm for T-cell therapy. *IFAC-PapersOnLine*. Elsevier; 2018;51(19):76–79.
- 514 13. Baker M, Denman-Johnson S, Brook BS, Gaywood I, Owen MR. Mathematical modelling  
515 of cytokine-mediated inflammation in rheumatoid arthritis. *Mathematical medicine and*  
516 *biology: a journal of the IMA*. OUP; 2013;30(4):311–337.



- 517 14. Zhang W, Jang S, Jonsson CB, Allen LJ. Models of cytokine dynamics in the inflammatory  
518 response of viral zoonotic infectious diseases. *Mathematical medicine and biology: a*  
519 *journal of the IMA*. Oxford University Press; 2019;36(3):269–295.
- 520 15. Du SQ, Yuan W. Mathematical modeling of interaction between innate and adaptive  
521 immune responses in COVID-19 and implications for viral pathogenesis. *Journal of*  
522 *Medical Virology*. Wiley Online Library; 2020;
- 523 16. Karki R, Sharma BR, Tuladhar S, Williams EP, Zalduondo L, Samir P, et al. COVID-19  
524 cytokines and the hyperactive immune response: Synergism of TNF- $\alpha$  and IFN- $\gamma$  in  
525 triggering inflammation, tissue damage, and death. *bioRxiv*. Cold Spring Harbor  
526 Laboratory; 2020;
- 527 17. Ley K. The second touch hypothesis: T cell activation, homing and polarization.  
528 *F1000Research*. Faculty of 1000 Ltd; 2014;3.
- 529 18. Montecino-Rodriguez E, Berent-Maoz B, Dorshkind K, others. Causes, consequences,  
530 and reversal of immune system aging. *The Journal of clinical investigation*. *Am Soc Clin*  
531 *Investig*; 2013;123(3):958–965.
- 532 19. Mueller AL, McNamara MS, Sinclair DA. Why does COVID-19 disproportionately affect  
533 older people? *Aging*. 2020;12(10).
- 534 20. Kivity S, Agmon-Levin N, Blank M, Shoenfeld Y. Infections and autoimmunity—friends or  
535 foes? *Trends in immunology*. Elsevier; 2009;30(8):409–414.
- 536 21. Holyoak M, Leibold MA, Holt RD. *Metacommunities: spatial dynamics and ecological*  
537 *communities*. University of Chicago Press; 2005.
- 538 22. Siegelman JN. Reflections of a COVID-19 Long Hauler. *JAMA*. American Medical  
539 Association; 2020;324(20):2031–2032.
- 540 23. Carfi A, Bernabei R, Landi F, others. Persistent symptoms in patients after acute COVID-  
541 19. *Jama*. American Medical Association; 2020;324(6):603–605.
- 542 24. Baig AM. Chronic COVID Syndrome: Need for an appropriate medical terminology for  
543 Long-COVID and COVID Long-Haulers. *Journal of medical virology*. Wiley Online Library;  
544 2020;
- 545 25. Bonifant CL, Jackson HJ, Brentjens RJ, Curran KJ. Toxicity and management in CAR T-  
546 cell therapy. *Molecular Therapy-Oncolytics*. Elsevier; 2016;3:16011.
- 547 26. Hosseini I, Gadkar K, Stefanich E, Li C-C, Sun LL, Chu Y-W, et al. Mitigating the risk of  
548 cytokine release syndrome in a Phase I trial of CD20/CD3 bispecific antibody  
549 mosunetuzumab in NHL: impact of translational system modeling. *NPJ systems biology*  
550 *and applications*. Nature Publishing Group; 2020;6(1):1–11.
- 551 27. Wurfel M. Genetic insights into sepsis: what have we learned and how will it help? *Current*  
552 *pharmaceutical design*. Bentham Science Publishers; 2008;14(19):1900–1911.

553
